# Supplementary material for: Single-band red upconversion luminescence of Yb3+–Er3+via nonequivalent substitution in perovskite KMgF3 nanocrystals
Source: Royal Society of Chemistry journal article supplement (doi:10.1039/c5tc03600c), 2016-01-01
Supplement: c5tc03600c1.pdf [file c5tc03600c1.pdf]

## Supporting Information

### Single-band red upconversion luminescence of Yb<sup>3+</sup>-Er<sup>3+</sup> via nonequivalent substitution in perovskite KMgF<sub>3</sub> nanocrystals

M. Wu<sup>1</sup>, E. H. Song<sup>1</sup>, Z. T. Chen<sup>1</sup>, S. Ding<sup>1</sup>, S. Ye<sup>1,\*</sup>, J. J. Zhou<sup>2</sup>, S. Q. Xu<sup>2</sup>, Q. Y. Zhang<sup>1\*</sup>

<sup>1</sup>State Key Laboratory of Luminescent Materials and Devices, and Guangdong Provincial Key Laboratory of Fiber Laser Materials and Applied Techniques, South China University of Technology, Guangzhou 510641, China

<sup>2</sup>College of Material Science and Engineering, China Jiliang University, Hangzhou 310018, Zhejiang, China.

**Table S1.** Initial lattice constants for an 8×2×1 supercell of KMgF<sub>3</sub>.

| Lattice Constants          | Value     |
|----------------------------|-----------|
| <i>a</i> (Å)               | 32.3287   |
| <i>b</i> (Å)               | 8.0826    |
| <i>c</i> (Å)               | 4.0413    |
| <i>α</i> (degree)          | 90.0000   |
| <i>β</i> (degree)          | 90.0000   |
| <i>γ</i> (degree)          | 90.0000   |
| <i>V</i> (Å <sup>3</sup> ) | 1055.9807 |

<sup>1\*</sup> Author to whom correspondence should be addressed; Email: [msyes@scut.edu.cn](mailto:msyes@scut.edu.cn), [qyzhang@scut.edu.cn](mailto:qyzhang@scut.edu.cn)

**Table S2.** Optimized cell parameters and forming energy ( $E$ ) of four K-Mg substitution geometry modes (denoted as M1, M2, M3, M4) for an  $8 \times 2 \times 1$  supercell of  $\text{KMgF}_3$ :  $\text{Er}^{3+}$  with one  $\text{K}^+$  ion and one  $\text{Mg}^{2+}$  ion substituted by two  $\text{Er}^{3+}$  ions.

| Parameters             | M1        | M2        | M3        | M4        |
|------------------------|-----------|-----------|-----------|-----------|
| $a$ (Å)                | 33.2048   | 33.1347   | 34.4393   | 33.5208   |
| $b$ (Å)                | 8.1560    | 8.1530    | 8.1771    | 8.2821    |
| $c$ (Å)                | 4.0303    | 4.0357    | 4.0543    | 4.0275    |
| $\alpha$ (degree)      | 90.0000   | 90.0000   | 90.0000   | 90.0000   |
| $\beta$ (degree)       | 90.0000   | 90.0000   | 90.0000   | 90.0000   |
| $\gamma$ (degree)      | 90.0000   | 90.0000   | 90.0000   | 90.0000   |
| $V$ (Å <sup>3</sup> )  | 1091.4763 | 1090.2268 | 1141.7644 | 1118.1154 |
| $E$ (eV)               | -397.8999 | -397.8883 | -396.9790 | -396.0048 |
| $\Delta E$ (eV)        | 0.0000    | 0.0116    | 0.9209    | 1.8951    |
| $R_{\text{Er-Er}}$ (Å) | 3.5666    | 3.5723    | 8.4850    | 11.5542   |

$$\Delta E_{(M_i)} = E_{(M_i)} - E_{(M1)} \quad (i=1, 2, 3 \text{ and } 4).$$

**Table S3.** Optimized cell parameters and forming energy ( $E$ ) of four Mg-Mg substitution geometry modes (denoted as N1, N2, N3, N4) for an  $8 \times 2 \times 1$  supercell of  $\text{KMgF}_3$ :  $\text{Er}^{3+}$  with two  $\text{Mg}^{2+}$  ions substituted by two  $\text{Er}^{3+}$  ions.

| Parameters            | N1        | N2        | N3        | N4        |
|-----------------------|-----------|-----------|-----------|-----------|
| $a$ (Å)               | 33.1527   | 33.1505   | 33.1308   | 32.9757   |
| $b$ (Å)               | 8.2187    | 8.2419    | 8.2436    | 8.2481    |
| $c$ (Å)               | 4.0803    | 4.0942    | 4.0959    | 4.1741    |
| $\alpha$ (degree)     | 90.0000   | 90.0000   | 90.0000   | 90.0000   |
| $\beta$ (degree)      | 90.0000   | 90.0000   | 90.0000   | 90.0000   |
| $\gamma$ (degree)     | 90.0000   | 90.0000   | 90.0000   | 90.0000   |
| $V$ (Å <sup>3</sup> ) | 1111.7563 | 1118.6249 | 1118.6714 | 1135.3048 |
| $E$ (eV)              | -397.4641 | -397.4463 | -397.4555 | -397.0425 |
| $\Delta E$ (eV)       | 0.0000    | 0.0178    | 0.0086    | 0.4216    |
| $R_{Er-Er}$ (Å)       | 4.4528    | 8.6241    | 12.6058   | 16.4878   |

$$\Delta E_{(Ni)} = E_{(Ni)} - E_{(N1)} \quad (i=1, 2, 3 \text{ and } 4).$$
